# Supplementary material for: Target identification by image analysis
Source: Royal Society of Chemistry journal article supplement (doi:10.1039/c5np00113g), 2016-01-01
Supplement: c5np00113g1.pdf [file c5np00113g1.pdf]

**Table S1.** List of commercially available automated microscopes

| Company                                       | Device name                               | Confocal | Link                                                                                                                                                                                                                                                                                                                    |
|-----------------------------------------------|-------------------------------------------|----------|-------------------------------------------------------------------------------------------------------------------------------------------------------------------------------------------------------------------------------------------------------------------------------------------------------------------------|
| Acquifer AG<br>(Karlsruhe)                    | IM03                                      | No       | <a href="http://www.acquifer.de/high_content_screening/">http://www.acquifer.de/high_content_screening/</a>                                                                                                                                                                                                             |
| GE Healthcare Europe<br>GmbH<br>(Freiburg)    | IN CELL<br>2200/6000                      | No/ Yes  | <a href="http://www.gelifesciences.com/webapp/wcs/stores/servlet/catalog/en/GELifeSciences-de/products/AlternativeProductStructure_12997/29043323">http://www.gelifesciences.com/webapp/wcs/stores/servlet/catalog/en/GELifeSciences-de/products/AlternativeProductStructure_12997/29043323</a>                         |
| Leica Microsystems<br>GmbH<br>(Wetzlar)       | HCS-A module<br>for Leica<br>microscopes  | Yes      | <a href="http://www.leica-microsystems.com/de/produkte/lichtmikroskope/biowissenschaften/fluoreszenzmikroskope/details/product/leica-las-x-widefield-systems/">http://www.leica-microsystems.com/de/produkte/lichtmikroskope/biowissenschaften/fluoreszenzmikroskope/details/product/leica-las-x-widefield-systems/</a> |
| Molecular Devices,<br>LLC<br>(CA, USA)        | Image Express<br>Micro/Ultra              | No/Yes   | <a href="http://www.moleculardevices.com/systems/high-content-imaging/imageexpress-ultra-confocal-high-content-analysis-system">http://www.moleculardevices.com/systems/high-content-imaging/imageexpress-ultra-confocal-high-content-analysis-system</a>                                                               |
| Nikon GmbH<br>(Düsseldorf)                    | Ti HCS                                    | Yes      | <a href="http://nikon.com/products/instruments/lineup/bioscience/biological-microscopes/inverted/ti_eus/index.htm">http://nikon.com/products/instruments/lineup/bioscience/biological-microscopes/inverted/ti_eus/index.htm</a>                                                                                         |
| Olympus Deutschland<br>GmbH<br>(Hamburg)      | ScanR                                     | No       | <a href="http://www.olympus-europa.com/microscopy/en/microscopy/components/component_details/component_detail_21320.jsp">http://www.olympus-europa.com/microscopy/en/microscopy/components/component_details/component_detail_21320.jsp</a>                                                                             |
| PerkinElmer Inc.<br>(MA, USA)                 | Operetta/Opera                            | No/yes   | <a href="http://www.perkinelmer.com/pages/020/cellularimaging/products/operetta.xhtml">http://www.perkinelmer.com/pages/020/cellularimaging/products/operetta.xhtml</a>                                                                                                                                                 |
| Thermo Fisher<br>Scientific Inc.<br>(MA, USA) | CellInsight/<br>Arrayscan XT1<br>Infinity | No/Yes   | <a href="https://www.lifetechnologies.com/order/catalog/product/ASN00004F">https://www.lifetechnologies.com/order/catalog/product/ASN00004F</a>                                                                                                                                                                         |
| Visitron Systems<br>GmbH<br>(Puchheim)        | CellVoyager<br>CV100<br>(preliminary)     | Yes      | <a href="http://www.visitron.de/Products/Confocal/Cell_Voyager_CV1000/cell_voyager_cv1000.html">http://www.visitron.de/Products/Confocal/Cell_Voyager_CV1000/cell_voyager_cv1000.html</a>                                                                                                                               |
| Wako Automation<br>(CA, USA)                  | Yokogawa<br>CV7000s/CQ1                   | Yes      | <a href="https://www.lifetechnologies.com/order/catalog/product/ASN00004F">https://www.lifetechnologies.com/order/catalog/product/ASN00004F</a>                                                                                                                                                                         |

**Table S2.** Bioinformatical approaches for compound profiling

| Approach                                                  | Description                                                                                                                                                                                                                                                                                                                                                                                                                                                     | References<br>See main text |
|-----------------------------------------------------------|-----------------------------------------------------------------------------------------------------------------------------------------------------------------------------------------------------------------------------------------------------------------------------------------------------------------------------------------------------------------------------------------------------------------------------------------------------------------|-----------------------------|
| Principal component analysis (PCA)                        | PCA aims at reducing data complexity (dimension reduction by linear combination of descriptors/features) of multivariate data sets and improving interpretation and visualization. For this only principal components are considered that cover most of the variability within the dataset.                                                                                                                                                                     | 41, 49, 51                  |
| Kohonen neural networking                                 | A Kohonen network is a self-organizing map (SOM) that produces a low dimensional representation for comparison of multiparametric phenotypic responses. First, multivariate measurements of a training set (compounds with known MOA) are analyzed for constructing a map. In the second step, measurements from unknown compounds are mapped to the predefined classes.                                                                                        | 49                          |
| Distance/<br>similarity of mean profiles                  | For each feature the average is calculated. Feature responses derived from untreated or with known compounds treated cells are scaled to cover a common range. Compound profiles are then generated consisting of all features represented by their mean values. Using a distance measure the similarity of the profiles can be calculated and further analyzed by e.g. rank based approaches or cluster analysis.                                              | 41, 47, 51                  |
| Kolmogorov-Smirnov (KS)-statistic                         | The KS-algorithm is a nonparametric hypothesis test for comparing population responses. It is based on the maximum difference that is calculated between two cumulative distribution functions (CDF) of each feature. Profiles of scored KS-statistics can be used for profiling mode of actions.                                                                                                                                                               | 9, 47                       |
| Normal vector to support-vector machine (SVM) hyperplanes | The SVM algorithm is a supervised data mining method that can be used, for pattern recognition. For constructing a SVM, objects for training are needed. In case of image analysis the SVM has to be trained to discriminate compound-treated from control cells. The SVM is then able to generate a hyperplane that divides both conditions in the feature space. The normal vector of the hyperplane is included from every feature for generating a profile. | 44, 47                      |
| Gaussian mixture modeling (GMM)                           | In GMM it is assumed that compound treatment induces a limited number of cellular phenotypes. Features are represented here as a mixture of Gaussian distributions. Subsamples of the data set are used to generate GMM profiles for untreated cells/ known compounds. Unknown samples can be assigned to a MOA class by the probability of their features to belong to one of the GMM profiles.                                                                | 45, 47                      |
| Factor analysis                                           | The application of factor analysis for phenotypic profiling is based on the assumption that a certain biological response (induced by compound treatment) is represented by several features of which subsets can exhibit high correlation. Correlated features are grouped and represent a common underlying factor. The factors allow for the interpretation of the biological effect of a compound.                                                          | 47, 48                      |
